# Supplementary material for: A Poorly Known High-Latitude Parasitoid Wasp Community: Unexpected Diversity and Dramatic Changes through Time
Source: PLOS journal article supplement (doi:10.1371/journal.pone.0023719), 2011-08-29

**Figure S2:** Length of CO1 sequences (bp) obtained from specimens (contemporary and historical collections) of Microgastrinae wasps at Churchill, Manitoba.

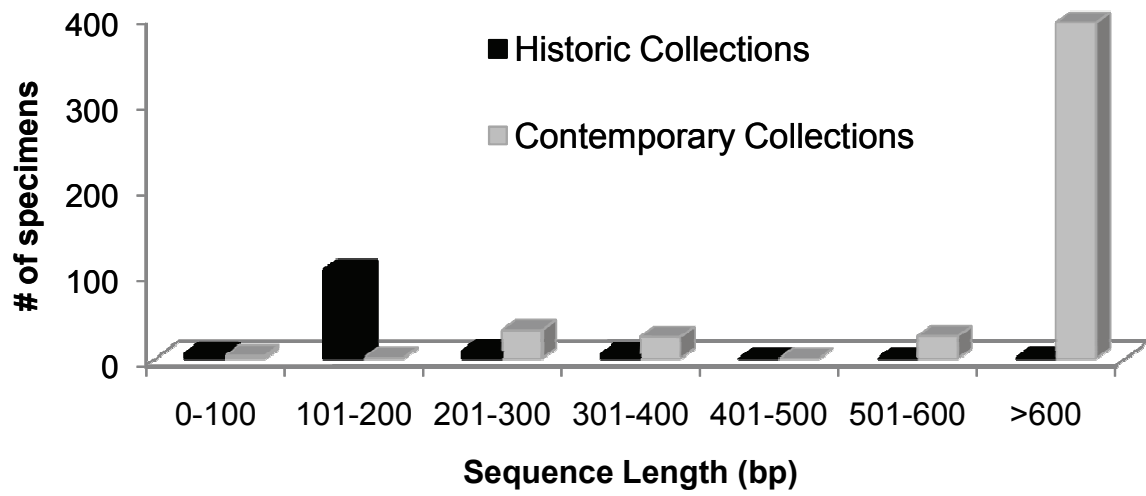

Supplement: S2 (10.1371/journal.pone.0023719.s002) [file journal.pone.0023719.s002]
