# Supplementary material for: A Poorly Known High-Latitude Parasitoid Wasp Community: Unexpected Diversity and Dramatic Changes through Time
Source: PLoS One. 2011 Aug 29;6(8):e23719. doi: 10.1371/journal.pone.0023719 (PMC3163582; doi:10.1371/journal.pone.0023719)
Supplement: Table S5 — All collection and accession information associated with specimens analysed here. (PDF) [file pone.0023719.s008.pdf]

**Table S5: All collection and accession information associated with specimens analysed here**

[illegible]

Table S5: All collection and accession information associated with specimens analysed here.

Table S5: All collection and accession information associated with specimens analysed here.

[illegible]

**Table S5: All collection and accession information associated with specimens analysed here.**

[illegible]

Table S5: All collection and accession information associated with specimens analysed here



**Table S5: All collection and accession information associated with specimens analysed here**

Table S5: All collection and accession information associated with specimens analysed here
